# Supplementary material
Source: PubMed Central journal article supplement (PMC1782041)
Supplement: pcbi.0030011.st001.pdf [file pcbi.0030011.st001.pdf]

| Model                 | df   | $\log L$ | AIC            | $AIC_c$        | BIC            | $P$ - value       | $s_{on}$ | $s_{off}$ | $r_{01}/r_{10}$ | $\sigma$ | $\alpha$ |
|-----------------------|------|----------|----------------|----------------|----------------|-------------------|----------|-----------|-----------------|----------|----------|
| 1. Full model         | 1424 | -19960.7 | <b>42769.4</b> | <b>48453.4</b> | <b>49272.3</b> |                   | 0.079    | 0.064     | 0.286           | 0.749    | 0.461    |
| 2. $s_{off} = s_{on}$ | 1423 | -19964.0 | 42774.0        | 48458.0        | 49272.4        | 0.01 (1,2)        | 0.076    | (0.076)   | 0.289           | 0.742    | 0.469    |
| 3. $1/\sigma = 0$     | 1423 | -20047.8 | 42941.6        | 48625.6        | 49440.0        | $\ll$ 0.001 (1,3) | 0.054    | 0.036     | 0.297           | NA       | 0.472    |
| 4. $r_{01} = r_{10}$  | 1423 | -20203.9 | 43253.9        | 48937.9        | 49752.2        | $\ll$ 0.001 (1,4) | 0.063    | 0.087     | (1)             | 0.841    | 0.395    |
| 5. $s_{off} = 0$      | 1422 | -20367.7 | 43579.5        | 49263.5        | 50073.2        | $\ll$ 0.001 (3,5) | NA       | (0)       | 0.144           | NA       | 0.536    |
| 6. $1/\alpha = 0$     | 1423 | -20444.9 | 43735.8        | 49419.8        | 50234.2        | $\ll$ 0.001 (1,6) | 0.044    | 0.121     | 0.295           | 0.580    | NA       |

Parameter definitions: df = degrees of freedom;  $L$  = likelihood; AIC = Akaike's Information Criterion;  $AIC_c$  = small-sample corrected AIC; BIC = Bayesian information criterion;  $s_{on}$ ,  $s_{off}$  = rates of switching to hidden states 'on' and 'off', respectively;  $r_{01}$ ,  $r_{10}$  = rates of potential N-linked glycosylation site (PNGS) gain and loss, respectively;  $\sigma$  = shape parameter for gamma-distributed rate variation in  $s_{on}$  and  $s_{off}$  across sites;  $\alpha$  = shape parameter for gamma-distributed rate variation in  $r_{01}$  and  $r_{10}$  across sites.  $P$ -values were estimated by a likelihood ratio test between the nested models indicated by numbering within parentheses. Minimized AIC,  $AIC_c$ , and BIC values are shown in boldface to indicate that the corresponding model is favored by the criterion.

### Table S1.

Goodness-of-fit and parameter estimates for covarion and nested models.
