# Supplementary material
Source: PubMed Central journal article supplement (PMC1782041)

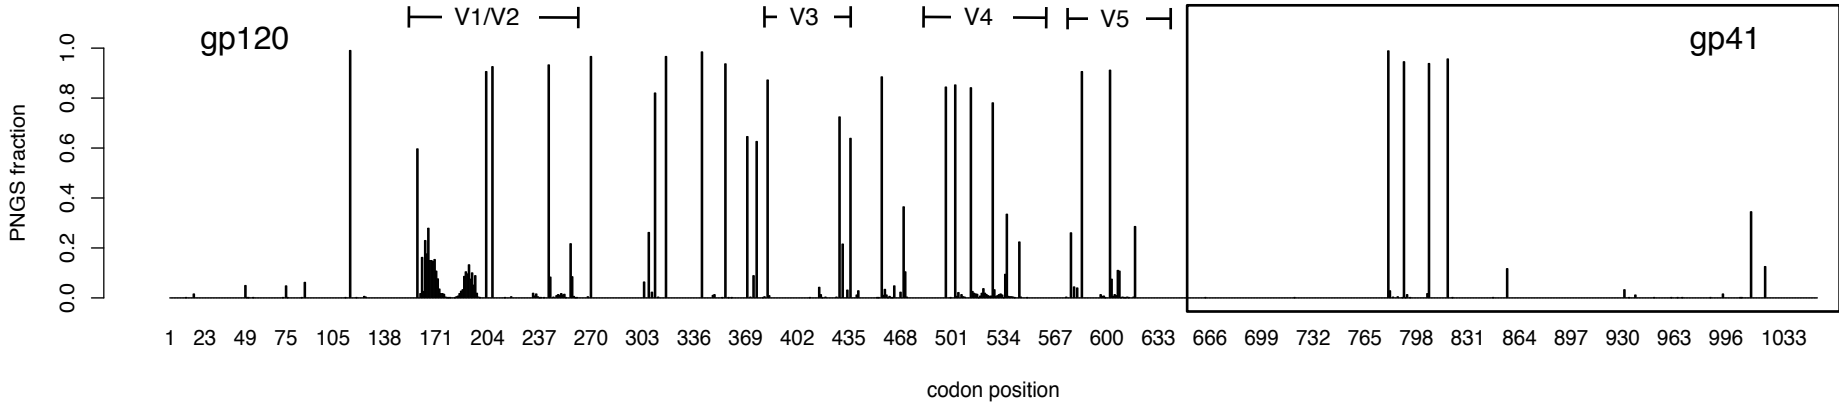

Supplement: pcbi.0030011.sg001.pdf [file pcbi.0030011.sg001.pdf]

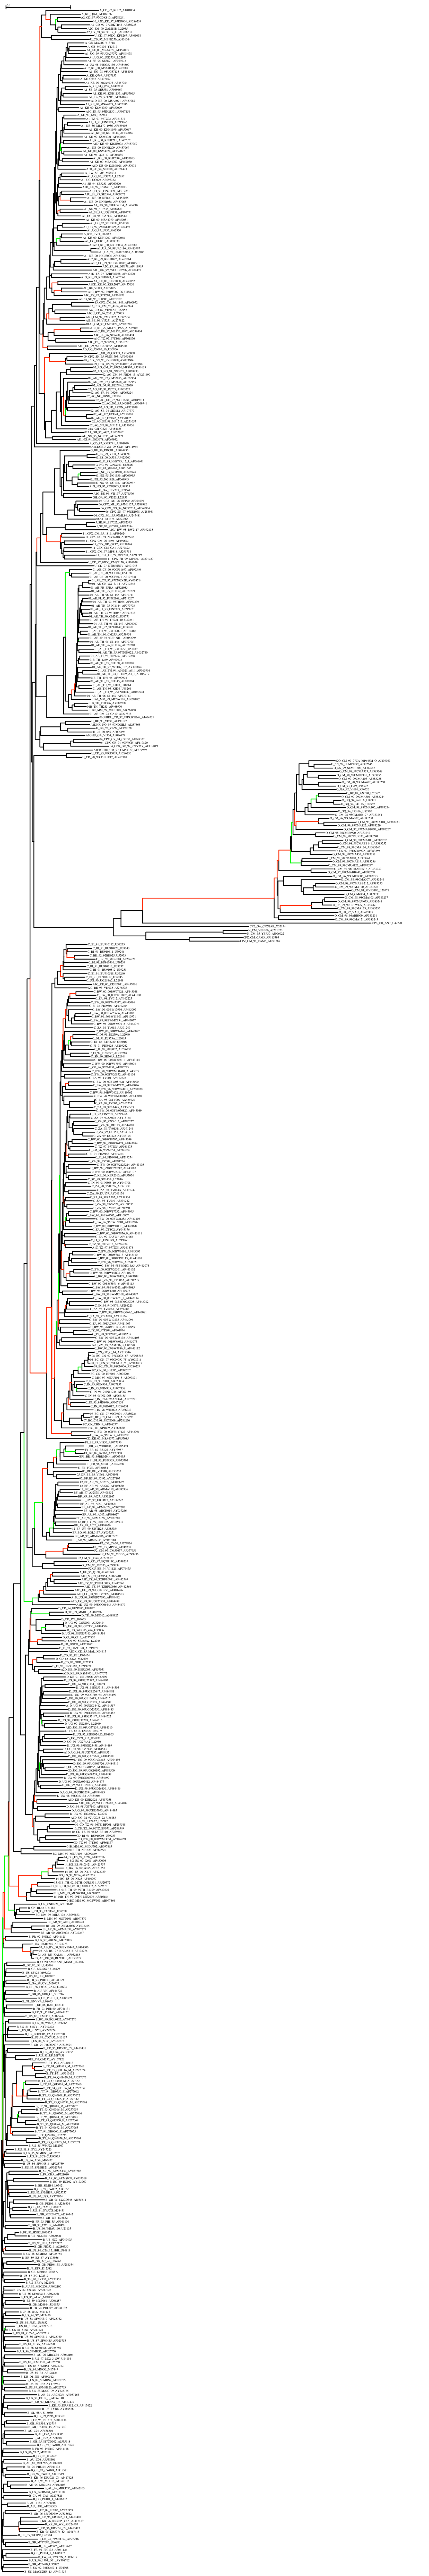

Supplement: pcbi.0030011.sg002.pdf [file pcbi.0030011.sg002.pdf]
